# Supplementary material for: Graphene-based reversible metal electrodeposition for dynamic infrared modulation
Source: Royal Society of Chemistry journal article supplement (doi:10.1039/d0tc00244e), 2020-01-01
Supplement: d0tc00244e1.pdf [file d0tc00244e1.pdf]

## **Electronic Supplementary Information:**

### **Graphene-based reversible metal electrodeposition for dynamic infrared modulation**

Mingyang Li, Dongqing Liu,\* Haifeng Cheng, Liang Peng, Mei Zu

Science and Technology on Advanced Ceramic Fibers and Composites Laboratory, College of Aerospace Science and Engineering, National University of Defense Technology, Changsha 410073, China

\*Corresponding Author

E-mail address: liudongqing07@nudt.edu.cn

**The 1<sup>st</sup> dissolution process of the G/PP device**

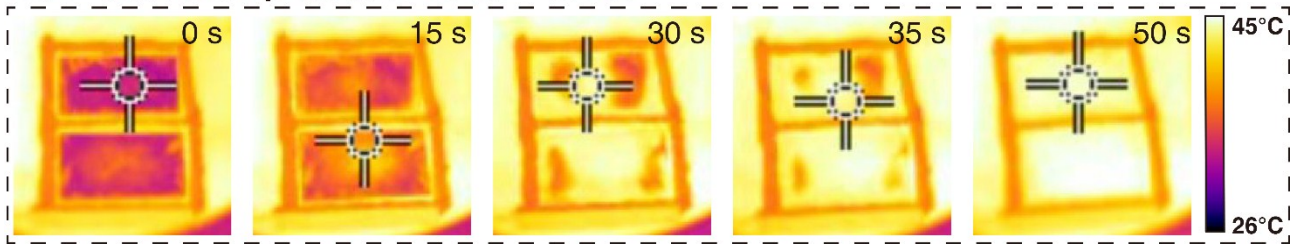

**Fig. S1.** Real-time IR images of the G/PP-based device during the first dissolution process.

**The 1<sup>st</sup> dissolution process of the G/BaF<sub>2</sub> device**

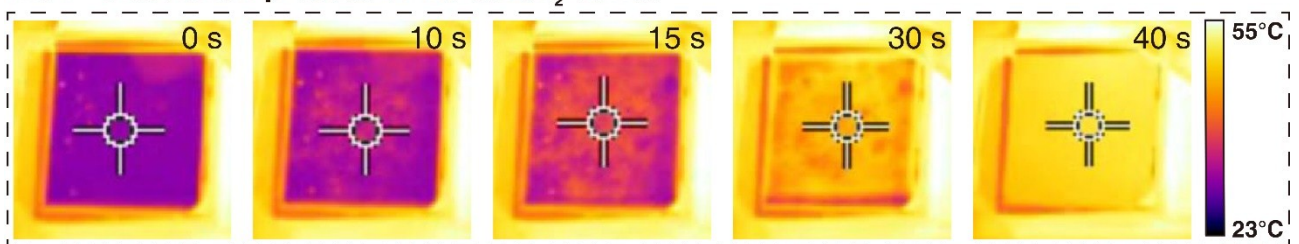

**Fig. S2.** Real-time IR images of the G/BaF<sub>2</sub>-based device during the first dissolution process.
